# Supplementary material for: Assigning the Origin of Microbial Natural Products by Chemical Space Map and Machine Learning
Source: PubMed Central journal article supplement (PMC7600738; doi:10.3390/biom10101385), 2020-09-28
Supplement: biomolecules-10-01385-s001.pdf [file biomolecules-10-01385-s001.pdf]

## **Supplementary materials for:**

# Assigning the Origin of Microbial Natural Products by Chemical Space Map and Machine Learning

Alice Capecchi and Jean-Louis Reymond\*

*Department of Chemistry and Biochemistry, University of Bern, Freiestrasse 3, 3012 Bern,  
Switzerland*

E-mail: [jean-louis.reymond@dcb.unibe.ch](mailto:jean-louis.reymond@dcb.unibe.ch)

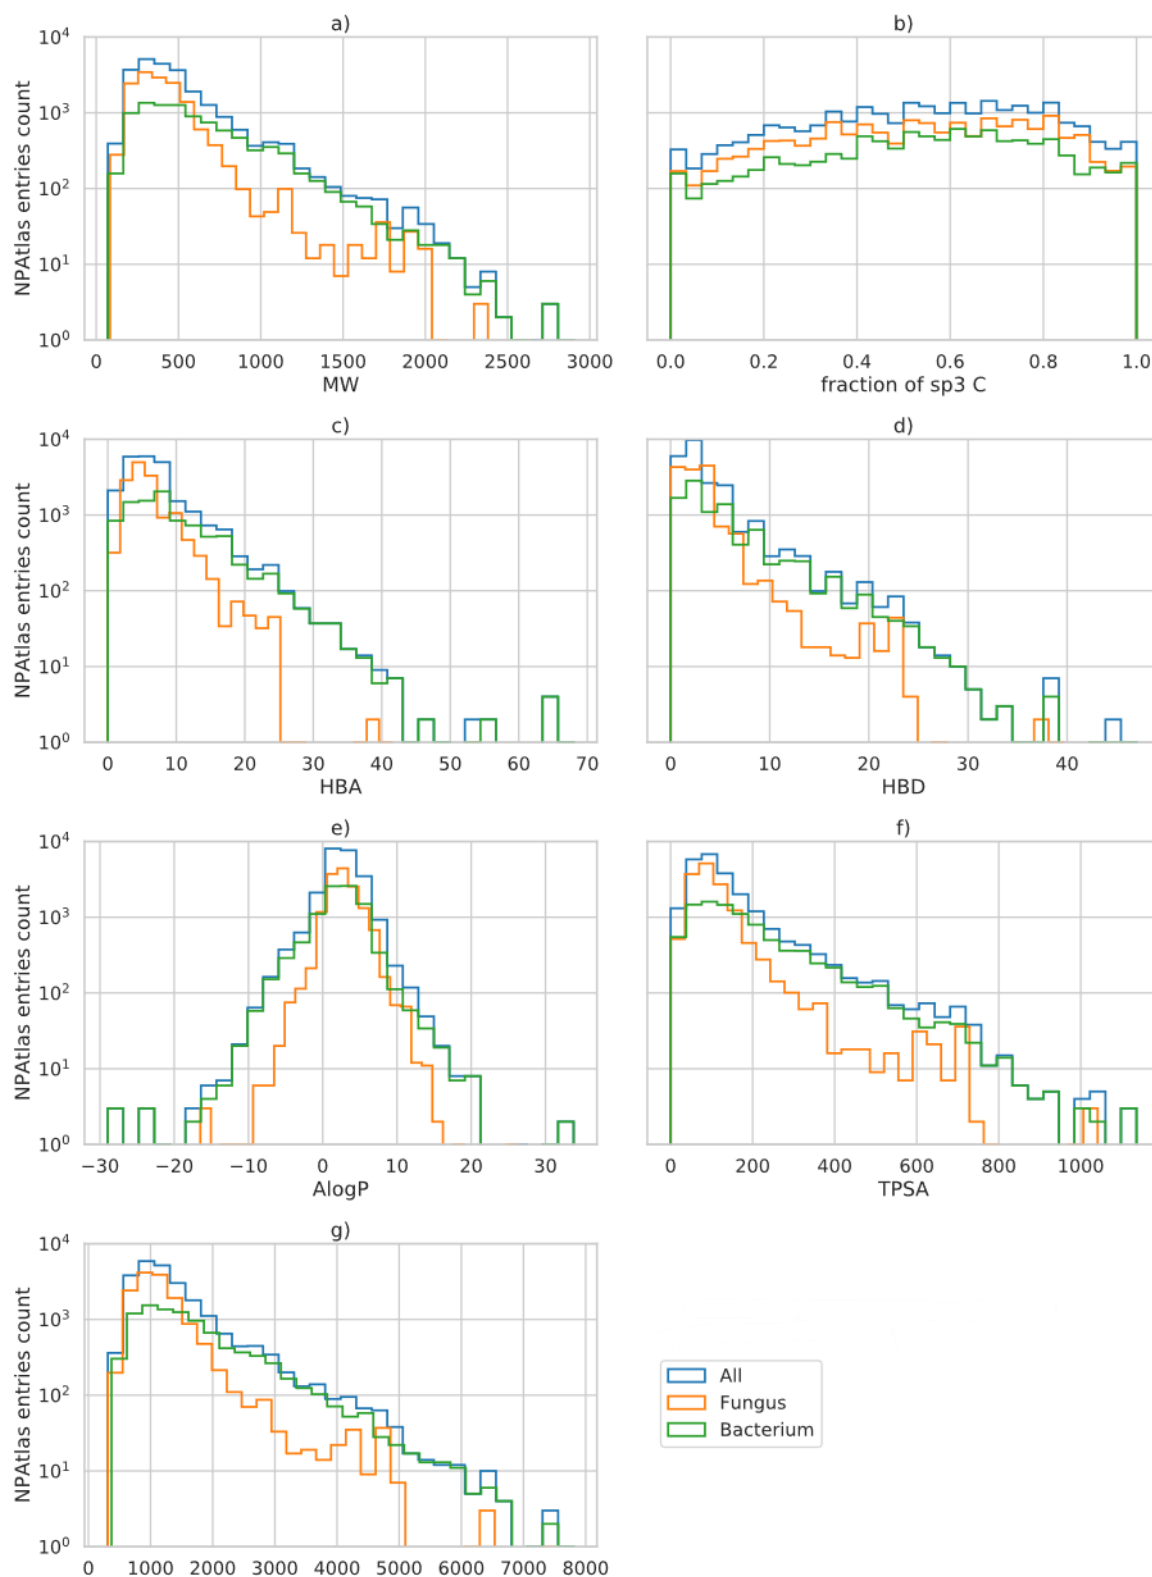

**Figure S1.** Physico-chemical properties distribution across the NPAtlas entries are shown in blue. The distribution within compounds of fungal and bacterial origin are also reported, in orange and green, respectively.

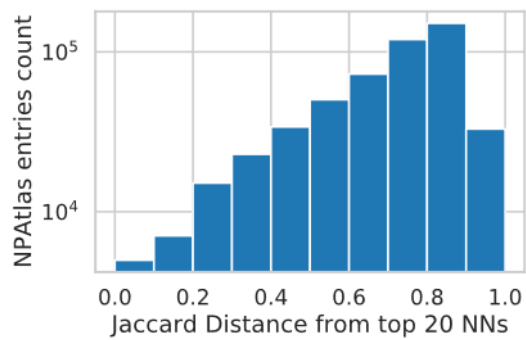

**Figure S2.** Approximated Jaccard distance from the top 20 NNs of all NPAAtlas entries.

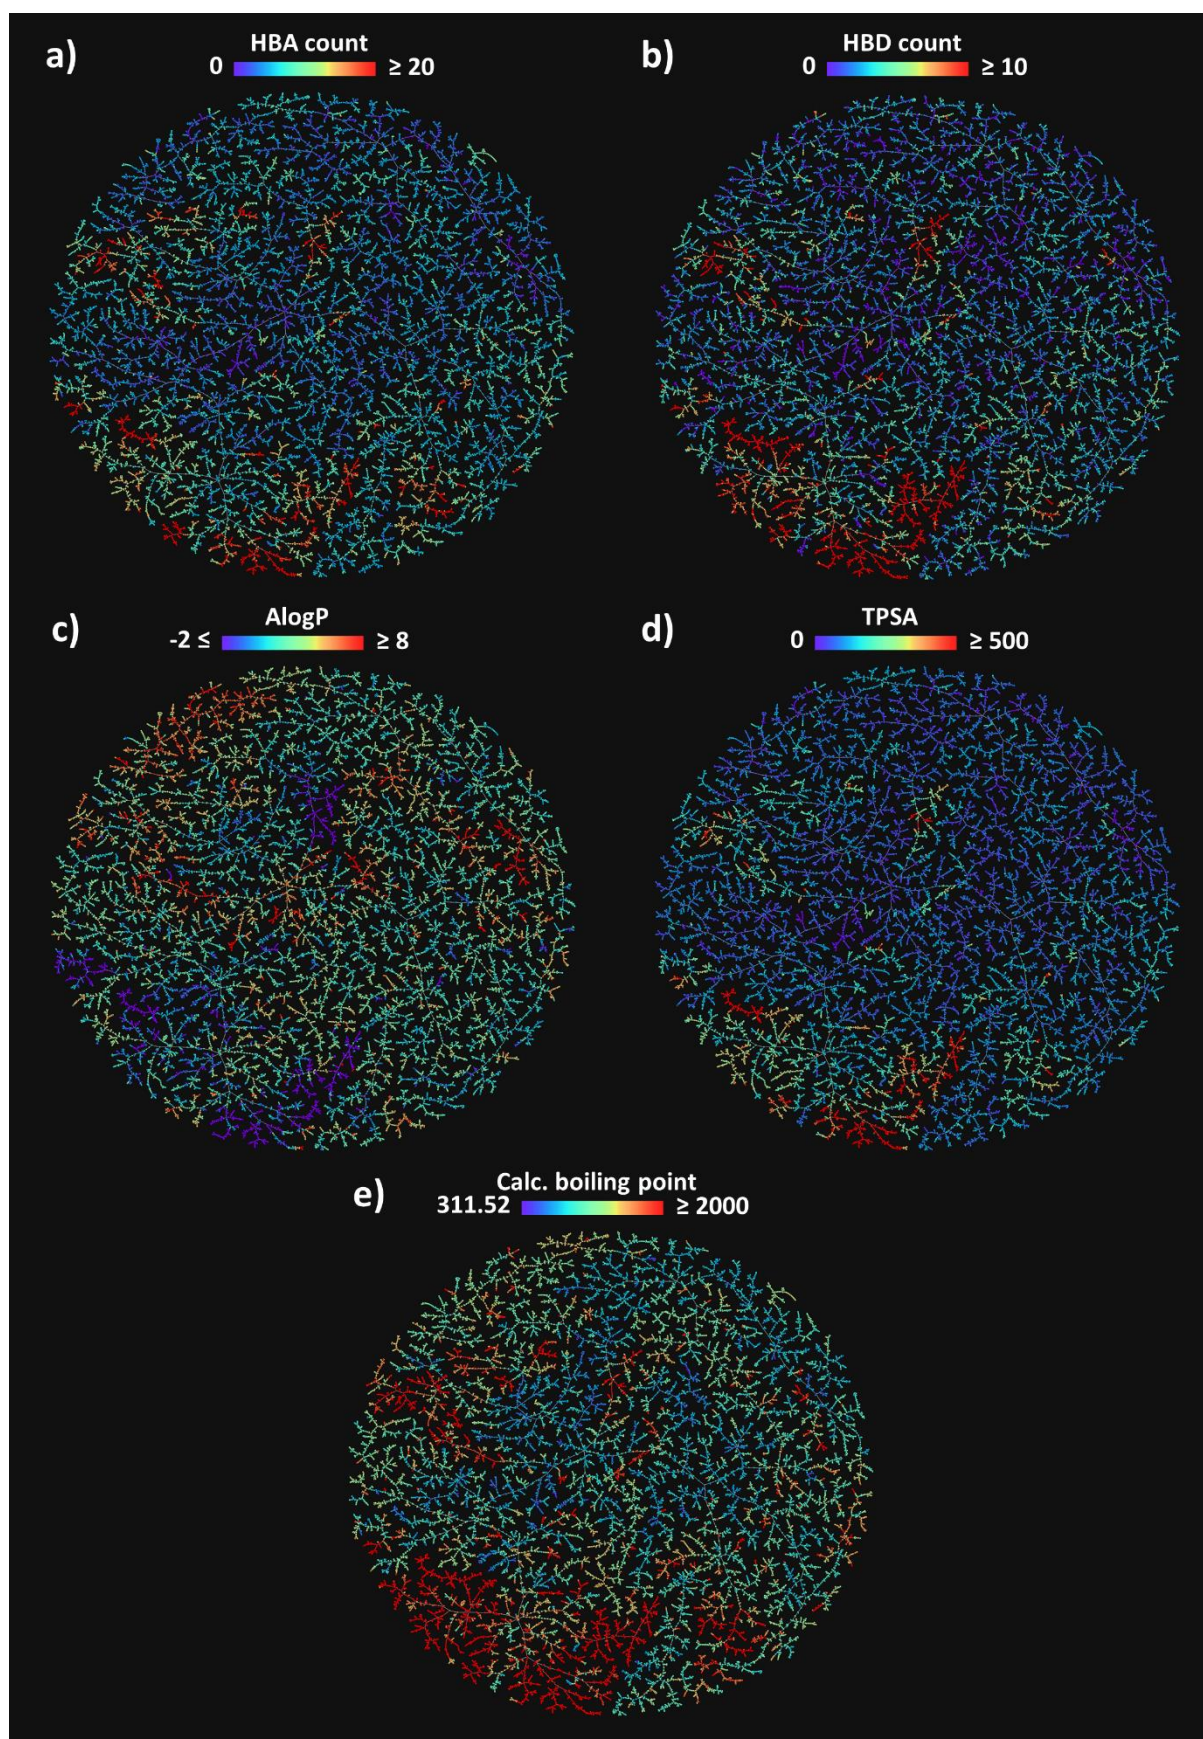

**Figure S3.** MAP4 TMAP of NPAtlas colored with the available continuous properties (a) HBA, (b) HBD, (c) AlogP, (d) TPSA, and (e) calculated boiling point.

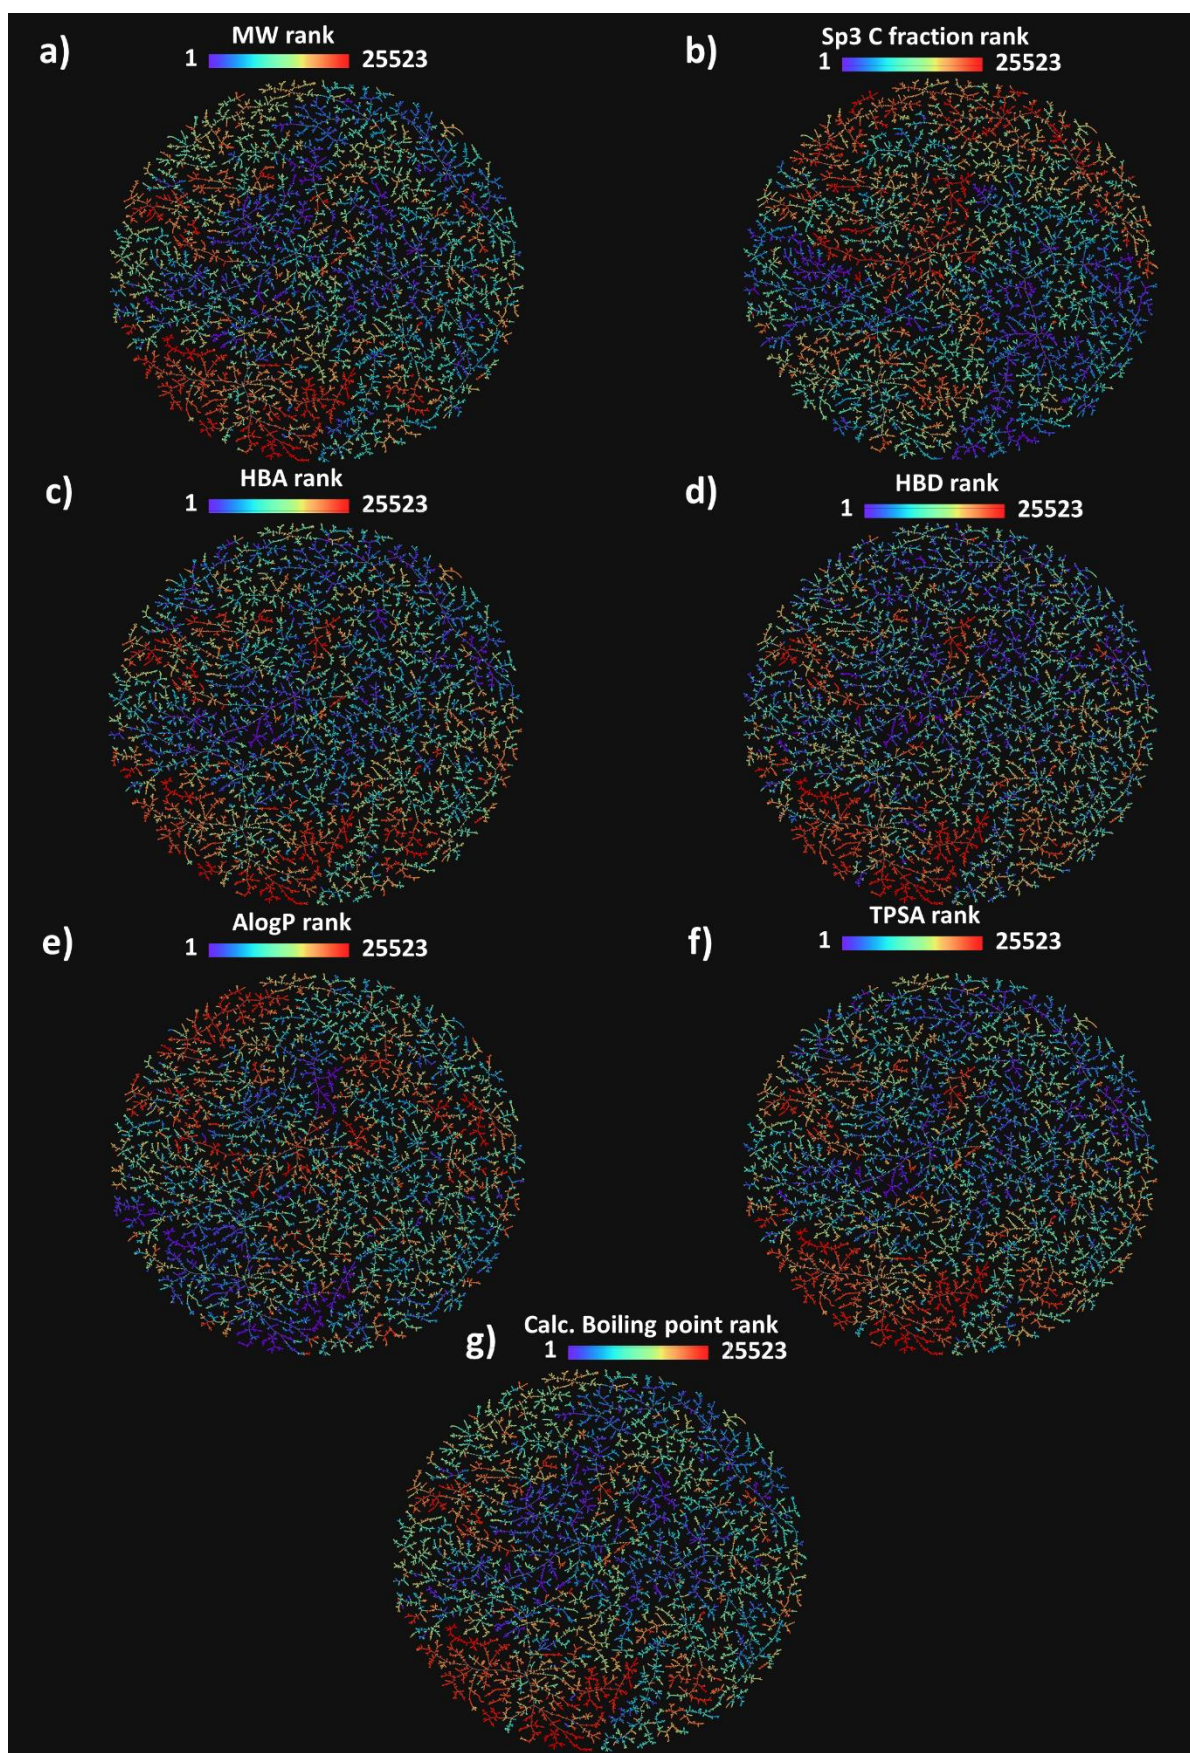

**Figure S4.** MAP4 TMAP of NPAtlas colored with the ranked continuous properties (a) MW, (b) fsp3C, (c) HBA, (d) HBD, (e) AlogP, (f) TPSA, (g) and calculated boiling point.

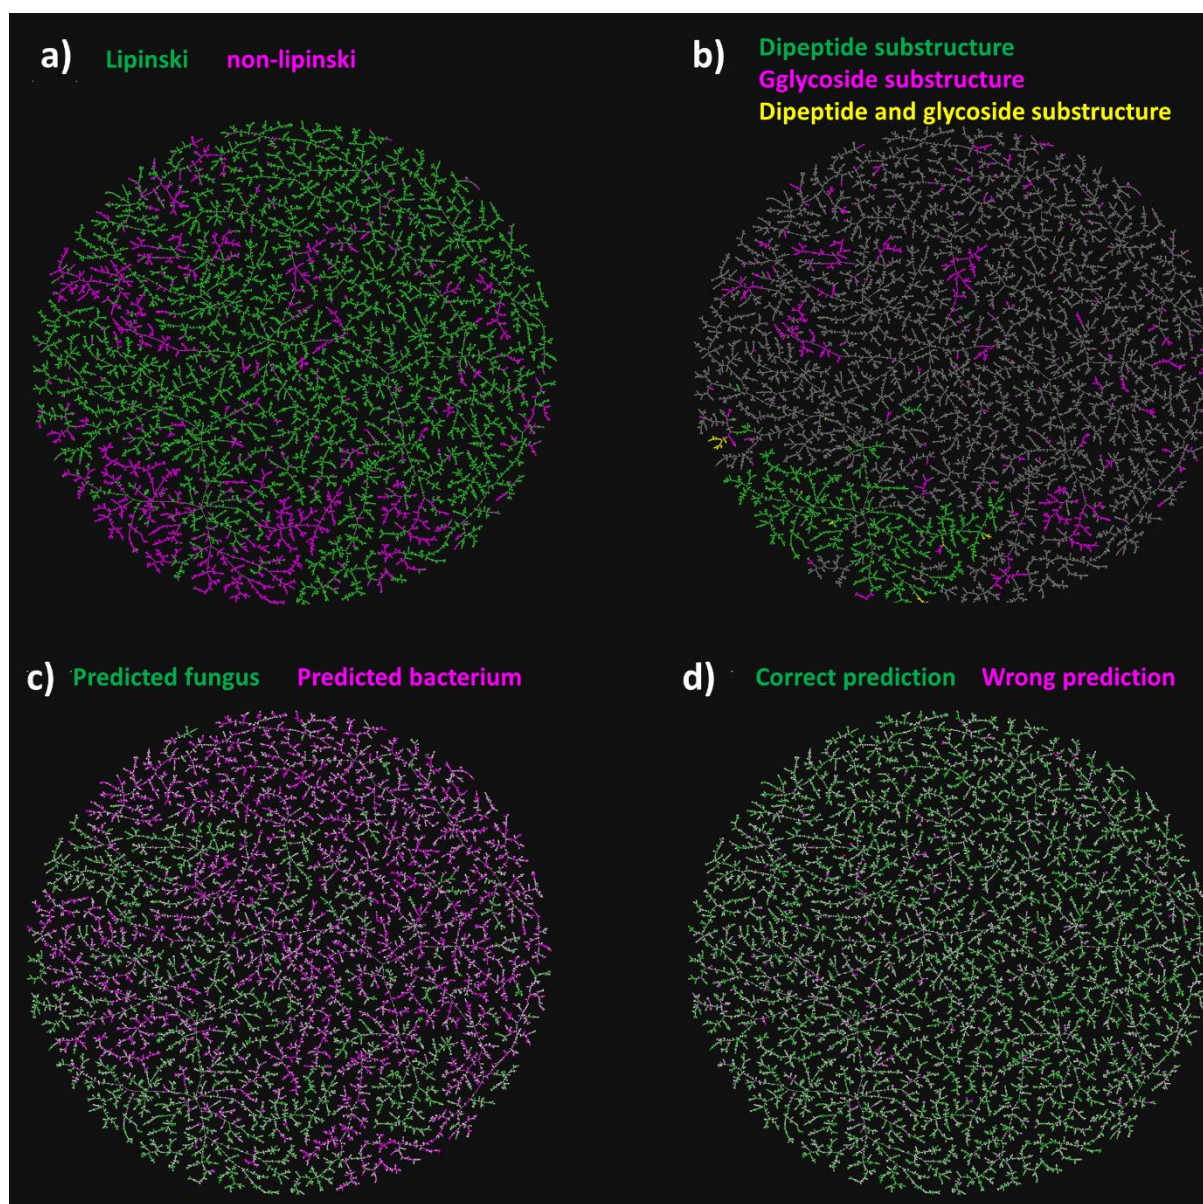

**Figure S5.** MAP4 TMAP of NPAtlas colored with categorical properties. (a) Lipinski classification. (b) Presence of glycoside and/or dipeptide substructures. (c) MAP4 SMV prediction. (d) MAP4 SVM performance.

**Table S1.** MAP4 SVMN classification of animal or plant NPs.

| Natural Product | Origin <sup>a)</sup> | MAP4 SVM pred. <sup>b)</sup><br>fungal, bacterial | Training set NN                    | JD from NN <sup>c)</sup> |
|-----------------|----------------------|---------------------------------------------------|------------------------------------|--------------------------|
| Salidroside     | Plant                | <b>0.75</b> , 0.25                                | NPA016219                          | 0.75                     |
| Prostacyclin    | Animal               | <b>0.94</b> , 0.06                                | Shorghumoic acid (NPA005601)       | 0.78                     |
| Serricorole     | Animal               | 0.16, <b>0.84</b>                                 | 6-deoxyerythronolide B (NPA004018) | 0.81                     |
| Cholesterol     | Animal               | <b>0.93</b> , 0.07                                | Micaceol (NPA018196)               | 0.37                     |
| Farnesol        | Plant,<br>animal     | <b>0.92</b> , 0.08                                | Trans-beta-Farnesene (NPA013150)   | 0.64                     |
| Menthol         | Plant                | <b>0.96</b> , 0.04                                | (+)-7-Hydroxymenthol (NPA012557)   | 0.50                     |
| Conotoxin MVIIA | Animal               | 0.13, <b>0.87</b>                                 | Siamycin II (NPA020589)            | 0.75                     |

a) Natural product origin. b) Predicted origin: fungal or bacterial. c) Approximated Jaccard Distance (JD, see methods for details) from the training set NN.

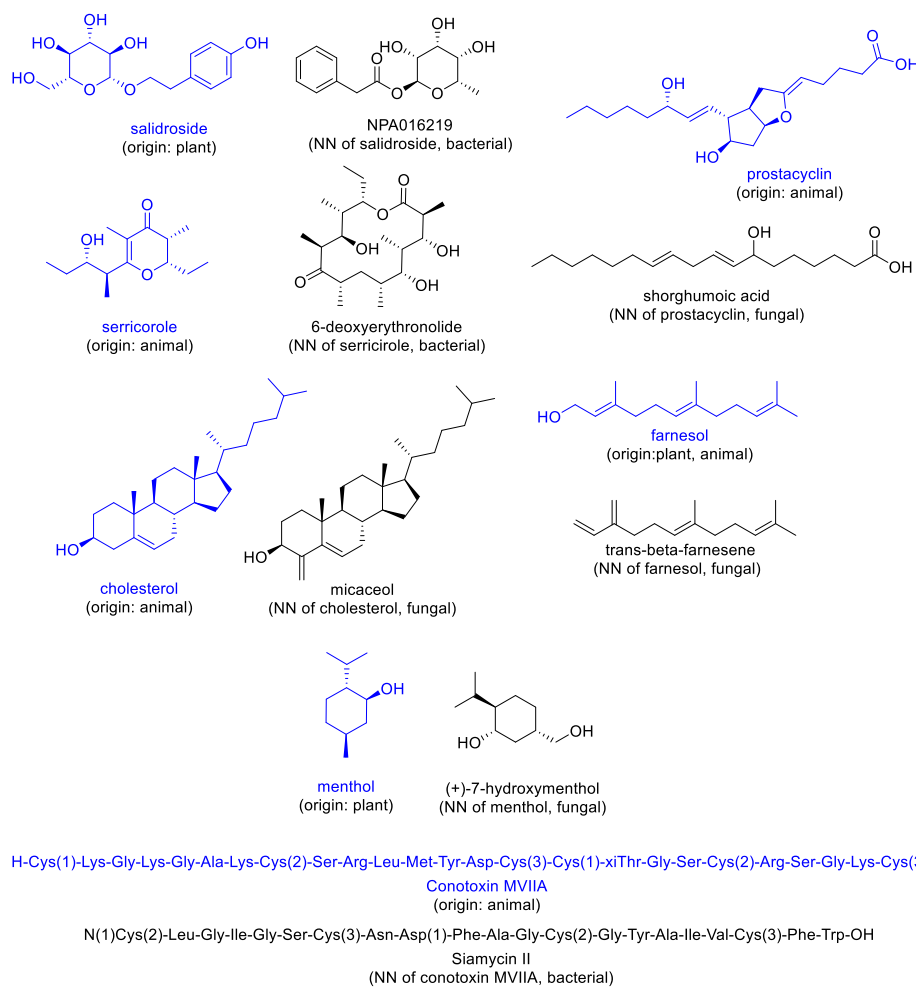

**Figure S6.** Examples of NPs from animals or plants (blue) and their NPAAtlas training set NN (black). See also Table S1.
